# Supplementary material
Source: PubMed Central journal article supplement (PMC4492550)
Supplement: Supp_Figure1.pdf [file Supp_Figure1.pdf]

## Supplementary Data

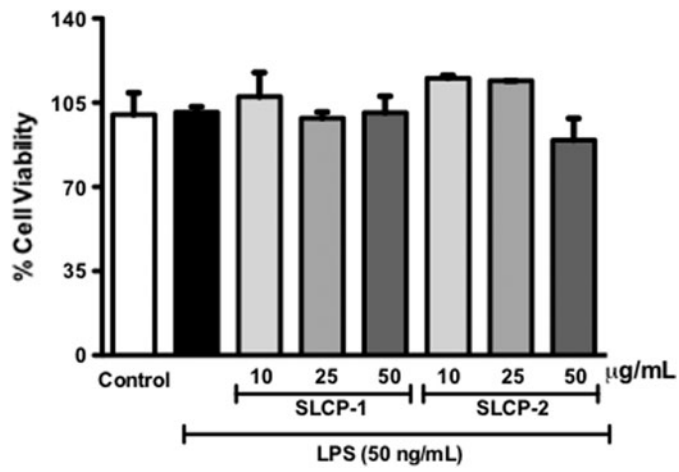

**SUPPLEMENTARY FIG. S1.** Effects of SLCP formulations on viability of RAW 264.7 macrophages.
